# Supplementary material for: TRAF1 is a key mediator for hepatic ischemia/reperfusion injury
Source: PubMed Central journal article supplement — Cell Death Dis. 2014 Oct 16;5(10):e1467–. doi: 10.1038/cddis.2014.411 (PMC4649517; doi:10.1038/cddis.2014.411), 2014-10-16
Supplement: cddis2014411x1.pdf [file cddis2014411x1.pdf]

## **TRAF1 is a Key Mediator for Hepatic Ischemia/Reperfusion Injury**

Xiao-Fei Zhang<sup>1\*</sup>, Ran Zhang<sup>2\*</sup>, Ling Huang<sup>3,4\*</sup>, Pi-Xiao Wang<sup>3,4</sup>, Yan Zhang<sup>3,4</sup>, Ding-Sheng Jiang<sup>3,4</sup>,  
Li-Hua Zhu<sup>3,4</sup>, Song Tian<sup>3,4</sup>, Xiao-Dong Zhang<sup>1</sup>, Hongliang Li<sup>3,4#</sup>

<sup>1</sup>College of Life Sciences, Wuhan University, Wuhan 430072, PR China; <sup>2</sup>National Laboratory of Medical Molecular Biology, Institute of Basic Medical Sciences, Chinese Academy of Medical Sciences and Peking Union Medical College, Beijing, 100005, China; <sup>3</sup>Department of Cardiology, Renmin Hospital of Wuhan University, Wuhan 430060, China; <sup>4</sup>Cardiovascular Research Institute, Wuhan University, Wuhan 430060, China;

**Key Words:** Inflammation; Apoptosis; Regeneration; Hepatocytes; ASK1

**Running Title:** TRAF1 mediates hepatic injury

\*These authors contributed equally to this work.

### **Correspondence to**

**Hongliang Li, MD, PhD**

Department of Cardiology

Renmin Hospital of Wuhan University

Cardiovascular Research Institute, Wuhan University

JieFang Road 238, Wuhan 430060, PR China.

Tel/Fax: 86-27-88076990;

E-mail: [lihl@whu.edu.cn](mailto:lihl@whu.edu.cn)

## Supporting Tables

**Supporting Table 1. Serum Cytokine Assay Kits.**

| <b>Item</b>                          | <b>Manufacturer</b> | <b>Cat No.</b>  |
|--------------------------------------|---------------------|-----------------|
| RayBio® Mouse IL-1 $\beta$ ELISA Kit | RayBio              | ELM-IL1beta-001 |
| Mouse IL-10                          | Invitrogen          | KMC0101         |
| Mouse IL-2                           | Invitrogen          | KMC0021         |
| Mouse IL-6                           | Invitrogen          | KMC0061         |
| Mouse TNF- $\alpha$                  | Peprotech           | 900-K54         |

**Supporting Table 2. Primers for Real-time PCR Detection and Plasmid Construction.**

| <b>Genes</b>  |         | <b>Sequence 5'---3'</b>         |
|---------------|---------|---------------------------------|
| GAPDH         | Forward | ACTCCACTCACGGCAAATTC            |
|               | Reverse | TCTCCATGGTGGTGAAGACA            |
| IL-1 $\beta$  | Forward | CCGTGGACCTTCCAGGATGA            |
|               | Reverse | GGGAACGTCACACACCAGCA            |
| IL-6          | Forward | AGTTGCCTTCTTGGGACTGA            |
|               | Reverse | TCCACGATTTCCCAGAGAAC            |
| TNF- $\alpha$ | Forward | CATCTTCTCAA AATTCGAGTGACAA      |
|               | Reverse | TGGGAGTAGACAAGGTACAACCC         |
| IL-2          | Forward | CCTGAGCAGGATGGAGAATTACA         |
|               | Reverse | TCCAGAACATGCCGCAGAG             |
| IL-10         | Forward | CCAAGCCTTATCGGAAATGA            |
|               | Reverse | TTTTCACAGGGGAGAAATCG            |
| IFN- $\gamma$ | Forward | TGCCAAGTTTGAGGTCAACAACCCA       |
|               | Reverse | ACCCCGAATCAGCAGCGACT            |
| caspase3      | Forward | ACTCTTCATCATT CAGGCCTGCCG       |
|               | Reverse | TGGATGAACCACGACCCGTCCT          |
| Bcl2          | Forward | TGGTGGACAACATCGCCCTGTG          |
|               | Reverse | GGTCGCATGCTGGGGCCATATA          |
| PCNA          | Forward | AGATGCCGTCGGGTGAATTTGC          |
|               | Reverse | TCCATTGCCAAGCTCTCCACT           |
| cyclinD1      | Forward | TGTGCTGCGAAGTGGAGACCAT          |
|               | Reverse | ACTTCTGCTCCTCACAGACCTCCA        |
| CycinE1       | Forward | TCTTCGTGCAGATCGCAGAGCT          |
|               | Reverse | AACCATGGCGAACGGAACCAT           |
| TRAF1-5'      |         | CGCGGATCCATGGCCTCCAGCTCAGCCCCT  |
| TRAF1-3'      |         | CCGCTCGAGCTAAGCACTAGTGTCACAATGC |

|            |                                              |
|------------|----------------------------------------------|
| TRAF1-N-3' | CCG <u>CTCGAG</u> CTAAGTACCATCAAAGGATGCCTC   |
| TRAF1-C-5' | CGC <u>GGATCC</u> ACTTTCCTGTGGAAGATCACC      |
| ASK1-5'    | CGC <u>GGATCCGTCGAC</u> ATGAGCACGGAGGCGGACGA |
| ASK1-3'    | ACGCG <u>TCGACT</u> CAAGTCTGTTTGTTCGAAA      |
| ASK1-N1-3' | ACGCG <u>TCGACT</u> CAATCATATTCATAGTCATACT   |
| ASK1-C1-5' | CGC <u>GGATCC</u> GATGAAAATGGTGACAGAGT       |
| ASK1-C1-3' | ACGCG <u>TCGACT</u> CACTCATCAACAAGCAAGTCGT   |
| ASK1-C2-5' | GGA <u>AGATCT</u> GAGTTTTTAAAAGTTTCAAGCAA    |

---

**Supporting Table 3. Antibodies for Immunoblot Analyses.**

| <b>Antibody</b>           | <b>Cat No.</b> | <b>Manufacturer</b>       | <b>MW(kDa)</b> | <b>Dilution</b> |
|---------------------------|----------------|---------------------------|----------------|-----------------|
| GAPDH(14C10)              | 2118           | Cell Signaling Technology | 37             | 1:1000          |
| IκBα(L35A5)               | 4814           | Cell Signaling Technology | 39             | 1:1000          |
| p-IκBα(ser32/36)          | 9246           | Cell Signaling Technology | 40             | 1:1000          |
| p-NF-κB p65(Ser536)       | 3033           | Cell Signaling Technology | 65             | 1:1000          |
| NFκBp65                   | 4764           | Cell Signaling Technology | 65             | 1:1000          |
| Bcl-2(50E3)               | 2870           | Cell Signaling Technology | 26             | 1:1000          |
| cleaved-Caspase3(asp175)  | 9661           | Cell Signaling Technology | 17             | 1:1000          |
| Caspase-3                 | 9662           | Cell Signaling Technology | 35             | 1:1000          |
| P-SAPK/JNK(Thr183/Tyr185) | 4668           | Cell Signaling Technology | 46,54          | 1:1000          |
| JNK1/2                    | 9258           | Cell Signaling Technology | 46,54          | 1:1000          |
| SEK1/MKK4                 | 9152           | Cell Signaling Technology | 41             | 1:1000          |
| p-SEK1/MKK4 (Ser257)      | 4514           | Cell Signaling Technology | 41             | 1:1000          |
| PCNA                      | 2586           | Cell Signaling Technology | 36             | 1:1000          |
| Bax                       | 2772           | Cell Signaling Technology | 20             | 1:1000          |
| p-c-Jun(S63)              | BS4045         | Bioworld                  | 48             | 1:1000          |
| p-c-Jun(S73)              | BS4046         | Bioworld                  | 48             | 1:1000          |
| Cyclin E (I119)           | BS1085         | Bioworld                  | 55             | 1:1000          |
| p-ASK1(Ser966)            | sc101634       | Santa Cruz                | 155            | 1:200           |
| ASK(H300)                 | sc7931         | Santa Cruz                | 155            | 1:200           |
| TRAF1                     | 4715           | Cell Signaling Technology | 50             | 1:1000          |
| Bcl-XL                    | 2764           | Cell Signaling Technology | 30             | 1:1000          |
| Bad                       | 9292           | Cell Signaling Technology | 23             | 1:1000          |
| Bak                       | 3814           | Cell Signaling Technology | 25             | 1:1000          |
| Bid                       | 2003           | Cell Signaling Technology | 22             | 1:1000          |
| Cyt C                     | 4280           | Cell Signaling Technology | 14             | 1:1000          |
| LDH                       | Ab53010        | Abcam                     | 36             | 1:2000          |
| COX II                    | sc-23983       | Santa Cruz                | 20             | 1:200           |
